# Supplementary material for: Tuning the photophysical and photo acidic properties of N-methyl-6-oxyquinolonium-based ionic liquid dyes: the role of solvent and substitution effects investigated by a TD-D3-DFT approach
Source: Royal Society of Chemistry journal article supplement (doi:10.1039/d3me00136a), 2023-11-14
Supplement: d3me00136a1.pdf [file d3me00136a1.pdf]

**Table S1**

The electronic density,  $\rho(r)$ , its corresponding Laplacian,  $\nabla^2\rho(r)$ , and electronic density energy,  $H(r)$ , at hydrogen bond critical points (HBCPs) for the **6MQz-AC** and **[6MQc][Y2-6]**, (Y2-6 =  $\text{CF}_3\text{CO}_2^-$ ,  $\text{BF}_4^-$ ,  $\text{CF}_3\text{SO}_3^-$ ,  $\text{N}(\text{CF}_3\text{SO}_2)_2^-$  and  $\text{PF}_6^-$ ) at PBE0/6-311++G(d, p) level of theory.

|                   | $\rho(r)$ | $\nabla^2\rho(r)$ | $H(r)$  |
|-------------------|-----------|-------------------|---------|
| <b>6MQz-AC</b>    |           |                   |         |
| C7H17...O24       | 0.0102    | 0.0312            | 0.0010  |
| H22-O23           | 0.2570    | -1.4653           | -0.4417 |
| C7-H17            | 0.2848    | -1.0090           | -0.2845 |
| O12...H22-O23     | 0.0970    | 0.1399            | -0.0405 |
| <b>[6MQc][Y2]</b> |           |                   |         |
| C7H17...O24       | 0.0161    | 0.0493            | 0.0015  |
| O12H22...O23      | 0.0619    | 0.1428            | -0.0139 |
| C7-H17            | 0.2850    | -1.0297           | -0.2863 |
| O12-H22           | 0.3042    | -2.1008           | -0.5920 |
| <b>[6MQc][Y3]</b> |           |                   |         |
| C7H17...F24       | 0.0103    | 0.0365            | 0.0143  |
| C7H17...F23       | 0.0067    | 0.0274            | 0.0012  |
| O12H22...F23      | 0.0374    | 0.1362            | -0.0010 |
| C7-H17            | 0.2862    | -1.0326           | -0.2877 |
| O12-H22           | 0.3399    | -2.4928           | -0.6836 |
| <b>[6MQc][Y4]</b> |           |                   |         |
| C7H17...O24       | 0.0128    | 0.0396            | 0.0012  |
| O12H22...O23      | 0.0453    | 0.1390            | -0.0043 |
| C7-H17            | 0.2860    | -1.0304           | -0.2872 |
| O12-H22           | 0.3286    | -2.3696           | -0.6550 |
| <b>[6MQc][Y5]</b> |           |                   |         |
| O12H22...O23      | 0.0356    | 0.1272            | -0.0001 |
| C7-H17...O23      | 0.0105    | 0.0370            | 0.0013  |
| C7-H17...O24      | 0.0127    | 0.0477            | 0.0020  |
| C7-H17            | 0.2872    | -1.0419           | -0.2896 |
| O12-H22           | 0.3422    | -2.4966           | -0.6857 |
| <b>[6MQc][Y6]</b> |           |                   |         |
| C7H17...F24       | 0.0098    | 0.0353            | 0.0012  |
| C7H17...F23       | 0.0056    | 0.0237            | 0.0011  |
| O12H22...F23      | 0.0298    | 0.1180            | 0.0010  |

|         |        |         |         |
|---------|--------|---------|---------|
| C7-H17  | 0.2866 | -1.0090 | -0.2880 |
| O12-H22 | 0.3482 | -2.5664 | -0.7016 |

**Table S2.** The calculated absorption wavelengths, oscillator strength,  $f$ , composition of the low-lying singlet excited states, and percentage of composition index (CI%) for the **[X][Y2-6]**, (X = 6MQc<sup>+</sup>, Y1-6 = CH<sub>3</sub>CO<sub>2</sub><sup>-</sup>, CF<sub>3</sub>CO<sub>2</sub><sup>-</sup>, BF<sub>4</sub><sup>-</sup>, CF<sub>3</sub>SO<sub>3</sub><sup>-</sup>, N(CF<sub>3</sub>SO<sub>2</sub>)<sub>2</sub><sup>-</sup> and PF<sub>6</sub><sup>-</sup>) in solution (Water, Acetonitrile, and Cyclohexene) at PBE0/6-311++G(d,p) level of theory

|                                | Transition                     | $\lambda$ (nm)                 | $f$    | Composition | CI (%) |
|--------------------------------|--------------------------------|--------------------------------|--------|-------------|--------|
| <b>[X]<sup>+</sup></b>         |                                | water                          |        |             |        |
|                                | S <sub>0</sub> →S <sub>1</sub> | 348.30                         | 0.0646 | H→L         | 96.50  |
|                                | S <sub>0</sub> →S <sub>2</sub> | 287.81                         | 0.1077 | H-1→L       | 79.22  |
|                                |                                |                                |        | H→L+1       | 18.46  |
|                                | S <sub>0</sub> →S <sub>3</sub> | 230.94                         | 0.6965 | H-1→L       | 16.50  |
|                                |                                |                                |        | H-1→L+2     | 4.88   |
|                                |                                |                                |        | H→L+1       | 69.6   |
|                                |                                |                                |        | H→L+2       | 6.51   |
|                                | <b>[X]</b>                     | S <sub>0</sub> →S <sub>1</sub> | 488.21 | 0.0855      | H→L    |
| S <sub>0</sub> →S <sub>2</sub> |                                | 380.87                         | 0.0000 | H-1→L       | 98.25  |
| S <sub>0</sub> →S <sub>3</sub> |                                | 309.52                         | 0.0076 | H-2→L       | 49.67  |
|                                |                                |                                |        | H→L+1       | 48.95  |
| <b>[X][Y1]</b>                 | S <sub>0</sub> →S <sub>1</sub> | 454.97                         | 0.1021 |             | 97.35  |
|                                | S <sub>0</sub> →S <sub>2</sub> | 330.41                         | 0.0000 | H-1→L       | 97.63  |
|                                | S <sub>0</sub> →S <sub>3</sub> | 304.62                         | 0.0053 | H-2→L       | 55.48  |
|                                |                                |                                |        | H→L+1       | 28.49  |
| <b>[X][Y2]</b>                 | S <sub>0</sub> →S <sub>1</sub> | 551.47                         | 0.0568 | H→L         | 98.50  |
|                                | S <sub>0</sub> →S <sub>2</sub> | 354.21                         | 0.0000 | H-1→L       | 98.41  |
|                                | S <sub>0</sub> →S <sub>3</sub> | 314.45                         | 0.0176 | H-1→L       | 60.84  |
|                                |                                |                                |        | H→L+1       | 18.88  |
|                                |                                |                                |        | H→L+2       | 18.37  |
| <b>[X][Y3]</b>                 | S <sub>0</sub> →S <sub>1</sub> | 360.39                         | 0.0727 | H→L         | 95.67  |
|                                | S <sub>0</sub> →S <sub>2</sub> | 293.60                         | 0.1063 | H-1→L       | 78.95  |
|                                |                                |                                |        | H→L+1       | 17.88  |

|                |                       |        |        |         |       |
|----------------|-----------------------|--------|--------|---------|-------|
|                | $S_0 \rightarrow S_3$ | 236.54 | 0.6946 | H-1→L   | 15.74 |
|                |                       |        |        | H→L+2   | 3.79  |
|                |                       |        |        | H→L+1   | 72.89 |
|                |                       |        |        | H→L+2   | 2.4   |
| <b>[X][Y4]</b> | $S_0 \rightarrow S_1$ | 369.29 | 0.0792 | H→L     | 96.24 |
|                | $S_0 \rightarrow S_2$ | 293.31 | 0.0960 | H-1→L   | 77.14 |
|                |                       |        |        | H→L+1   | 20.02 |
|                | $S_0 \rightarrow S_3$ | 251.91 | 0.0026 | H-2→L   | 98.60 |
| <b>[X][Y5]</b> | $S_0 \rightarrow S_1$ | 348.73 | 0.0562 | H-1→L   | 14.04 |
|                |                       |        |        | H→L     | 95.45 |
|                | $S_0 \rightarrow S_2$ | 297.37 | 0.1217 | H-1→L   | 82.33 |
|                |                       |        |        | H→L+1   | 14.41 |
|                | $S_0 \rightarrow S_3$ | 248.27 | 0.0097 | H-2→L   | 92.33 |
|                |                       |        |        | H→L+1   | 4.75  |
| <b>[X][Y6]</b> | $S_0 \rightarrow S_1$ | 348.73 | 0.0562 | H→L     | 97.73 |
|                | $S_0 \rightarrow S_2$ | 297.37 | 0.1217 | H-1→L   | 76.17 |
|                |                       |        |        | H→L+1   | 9.98  |
|                | $S_0 \rightarrow S_3$ | 248.27 | 0.0097 | H-1→L   | 15.65 |
|                |                       |        |        | H-1→L+2 | 3.51  |
|                |                       |        |        | H→L+1   | 31.36 |
|                |                       |        |        | H→L+2   | 15.53 |

|                        | Transition            | $\lambda$ (nm) | $f$    | Composition | CI (%) |
|------------------------|-----------------------|----------------|--------|-------------|--------|
|                        |                       | Acetonitrile   |        |             |        |
| <b>[X]<sup>+</sup></b> | $S_0 \rightarrow S_1$ | 348.89         | 348.89 | H→L         | 96.51  |
|                        | $S_0 \rightarrow S_2$ | 287.96         | 0.1085 | H-1→L       | 79.28  |
|                        |                       |                |        | H→L+1       | 18.41  |
|                        | $S_0 \rightarrow S_3$ | 231.18         | 0.7010 | H-1→L       | 16.48  |
|                        |                       |                |        | H-1→L+2     | 4.82   |
|                        |                       |                |        | H→L+1       | 69.90  |
|                        |                       |                |        | H→L+2       | 6.36   |
| <b>[X]</b>             | $S_0 \rightarrow S_1$ | 491.39         | 0.0861 | H→L         | 97.77  |
|                        | $S_0 \rightarrow S_2$ | 383.81         | 0.0000 | H-1→L       | 98.26  |
|                        | $S_0 \rightarrow S_3$ | 310.12         | 0.0080 | H-2→L       | 49.32  |
|                        |                       |                |        | H→L+1       | 49.33  |
| <b>[X][Y1]</b>         | $S_0 \rightarrow S_1$ | 509.67         | 0.1034 | H→L         | 97.3   |
|                        | $S_0 \rightarrow S_2$ | 379.71         | 0.0000 | H-1→L       | 97.18  |
|                        | $S_0 \rightarrow S_3$ | 316.59         | 0.0072 | H-3→L       | 51.93  |
|                        |                       |                |        | H→L+1       | 46.76  |
| <b>[X][Y2]</b>         | $S_0 \rightarrow S_1$ | 641.07         | 0.0556 | H→L         | 98.64  |
|                        | $S_0 \rightarrow S_2$ | 410.26         | 0.0000 | H-1→L       | 98.63  |

|                |                       |        |        |         |       |
|----------------|-----------------------|--------|--------|---------|-------|
|                | $S_0 \rightarrow S_3$ | 327.71 | 0.0112 | H-2→L   | 59.42 |
|                |                       |        |        | H→L+1   | 38.91 |
| <b>[X][Y3]</b> | $S_0 \rightarrow S_1$ | 393.84 | 0.0751 | H-1→L   | 33.70 |
|                |                       |        |        | H→L     | 95.09 |
|                | $S_0 \rightarrow S_2$ | 306.40 | 0.1117 | H-1→L   | 79.63 |
|                |                       |        |        | H→L     | 2.21  |
|                |                       |        |        | H→L+1   | 16.50 |
|                | $S_0 \rightarrow S_3$ | 247.71 | 0.6699 | H-1→L   | 14.47 |
|                |                       |        |        | H-1→L+2 | 2.62  |
|                |                       |        |        | H→L+1   | 77.80 |
| <b>[X][Y4]</b> | $S_0 \rightarrow S_1$ | 404.63 | 0.0824 | H-2→L   | 2.41  |
|                |                       |        |        | H→L     | 95.81 |
|                | $S_0 \rightarrow S_2$ | 341.71 | 0.0034 | H-1→L   | 99.30 |
|                | $S_0 \rightarrow S_3$ | 304.89 | 0.0934 | H-3→L   | 2.21  |
|                |                       |        |        | H-2→L   | 75.27 |
|                |                       |        |        | H→L+1   | 19.11 |
| <b>[X][Y5]</b> | $S_0 \rightarrow S_1$ | 349.75 | 0.0564 | H-1→L   | 2.07  |
|                |                       |        |        | H→L     | 95.42 |
|                | $S_0 \rightarrow S_2$ | 297.92 | 0.1228 | H-1→L   | 82.44 |
|                |                       |        |        | H→L+1   | 14.23 |
|                | $S_0 \rightarrow S_3$ | 250.22 | 0.0071 | H-2→L   | 92.91 |
|                |                       |        |        | H→L+1   | 4.28  |
| <b>[X][Y6]</b> | $S_0 \rightarrow S_1$ | 437.13 | 0.0578 | H→L     | 97.73 |
|                | $S_0 \rightarrow S_2$ | 300.22 | 0.1007 | H-1→L   | 78.48 |
|                |                       |        |        | H→L     | 19.62 |
|                | $S_0 \rightarrow S_3$ | 244.10 | 0.5747 | H-1→L   | 7.95  |
|                |                       |        |        | H-1→L+2 | 3.39  |
|                |                       |        |        | H→L+1   | 32.47 |
|                |                       |        |        | H→L+2   | 13.36 |

|                        | Transition            | $\lambda$ (nm) | $f$    | Composition | CI (%) |
|------------------------|-----------------------|----------------|--------|-------------|--------|
|                        |                       | Cyclohexane    |        |             |        |
| <b>[X]<sup>+</sup></b> | $S_0 \rightarrow S_1$ | 361.56         | 0.0658 | H→L         | 96.69  |
|                        | $S_0 \rightarrow S_2$ | 290.83         | 0.1091 | H-1→L       | 79.26  |
|                        |                       |                |        | H→L+1       | 18.38  |
|                        | $S_0 \rightarrow S_3$ | 234.92         | 0.7314 | H-1→L       | 16.70  |
|                        |                       |                |        | H-1→L+2     | 4.20   |
|                        |                       |                |        | H→L+1       | 72.33  |
|                        |                       |                |        | H→L+2       | 4.73   |
| <b>[X]</b>             | $S_0 \rightarrow S_1$ | 488.21         | 0.0855 | H→L         | 97.76  |

|                |                       |        |        |         |       |
|----------------|-----------------------|--------|--------|---------|-------|
|                | $S_0 \rightarrow S_2$ | 380.87 | 0.0000 | H-1→L   | 98.25 |
|                | $S_0 \rightarrow S_3$ | 309.52 | 0.0076 | H-2→L   | 49.67 |
|                |                       |        |        | H→L+1   | 48.95 |
| <b>[X][Y1]</b> | $S_0 \rightarrow S_1$ | 509.67 | 0.1034 | H→L     | 97.32 |
|                | $S_0 \rightarrow S_2$ | 379.71 | 0.0000 | H-1→L   | 97.19 |
|                | $S_0 \rightarrow S_3$ | 316.59 | 0.0072 | H-3→L   | 51.93 |
|                |                       |        |        | H→L+1   | 46.76 |
| <b>[X][Y2]</b> | $S_0 \rightarrow S_1$ | 641.07 | 0.0556 | H→L     | 98.64 |
|                | $S_0 \rightarrow S_2$ | 410.26 | 0.0000 | H-1→L   | 98.63 |
|                | $S_0 \rightarrow S_3$ | 327.71 | 0.0112 | H-2→L   | 52.41 |
|                |                       |        |        | H→L+1   | 38.91 |
| <b>[X][Y3]</b> | $S_0 \rightarrow S_1$ | 393.84 | 0.0751 | H-1→L   | 3.27  |
|                |                       |        |        | H→L     | 95.09 |
|                | $S_0 \rightarrow S_2$ | 306.40 | 0.1117 | H-1→L   | 79.63 |
|                |                       |        |        | H→L     | 2.21  |
|                |                       |        |        | H→L+1   | 16.49 |
|                | $S_0 \rightarrow S_3$ | 247.71 | 0.6699 | H-1→L   | 14.47 |
|                |                       |        |        | H-1→L+2 | 2.61  |
|                |                       |        |        | H→L+1   | 77.79 |
| <b>[X][Y4]</b> | $S_0 \rightarrow S_1$ | 402.02 | 0.0892 | H-2→L   | 2.36  |
|                |                       |        |        | H-1→L   | 2.44  |
|                |                       |        |        | H→L     | 93.57 |
|                | $S_0 \rightarrow S_2$ | 347.81 | 0.0351 | H-1→L   | 95.18 |
|                |                       |        |        | H→L     | 2.85  |
|                | $S_0 \rightarrow S_3$ | 304.51 | 0.0774 | H-2→L   | 78.87 |
|                |                       |        |        | H→L+1   | 15.71 |
| <b>[X][Y5]</b> | $S_0 \rightarrow S_1$ | 373.46 | 0.0565 | H-2→L   | 2.15  |
|                |                       |        |        | H-1→L   | 2.35  |
|                |                       |        |        | H→L     | 93.59 |
|                | $S_0 \rightarrow S_2$ | 321.90 | 0.0683 | H-2→L   | 3.54  |
|                |                       |        |        | H-1→L   | 88.95 |
|                |                       |        |        | H→L     | 2.97  |
|                |                       |        |        | H→L+1   | 3.89  |
|                | $S_0 \rightarrow S_3$ | 299.11 | 0.0623 | H-2→L   | 80.63 |
|                |                       |        |        | H-1→L   | 7.15  |
|                |                       |        |        | H→L+1   | 9.62  |
| <b>[X][Y6]</b> | $S_0 \rightarrow S_1$ | 488.25 | 0.0551 | H→L     | 97.61 |
|                | $S_0 \rightarrow S_2$ | 313.58 | 0.0978 | H-1→L   | 78.88 |
|                |                       |        |        | H→L+1   | 19.02 |
|                | $S_0 \rightarrow S_3$ | 254.67 | 0.6540 | H-1→L   | 16.54 |
|                |                       |        |        | H-1→L+2 | 2.75  |
|                |                       |        |        | H→L+1   | 72.93 |
